# Supplementary figures and images for: Evaluation of Brace Treatment Using the Soft Brace Spinaposture: A Four-Years Follow-Up
Source: MDPI journal article supplement (doi:10.3390/jcm11010264), 2022-01-05

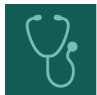

Supplement S1 Development in Cobb' angle for the 15 patients with AIS 1

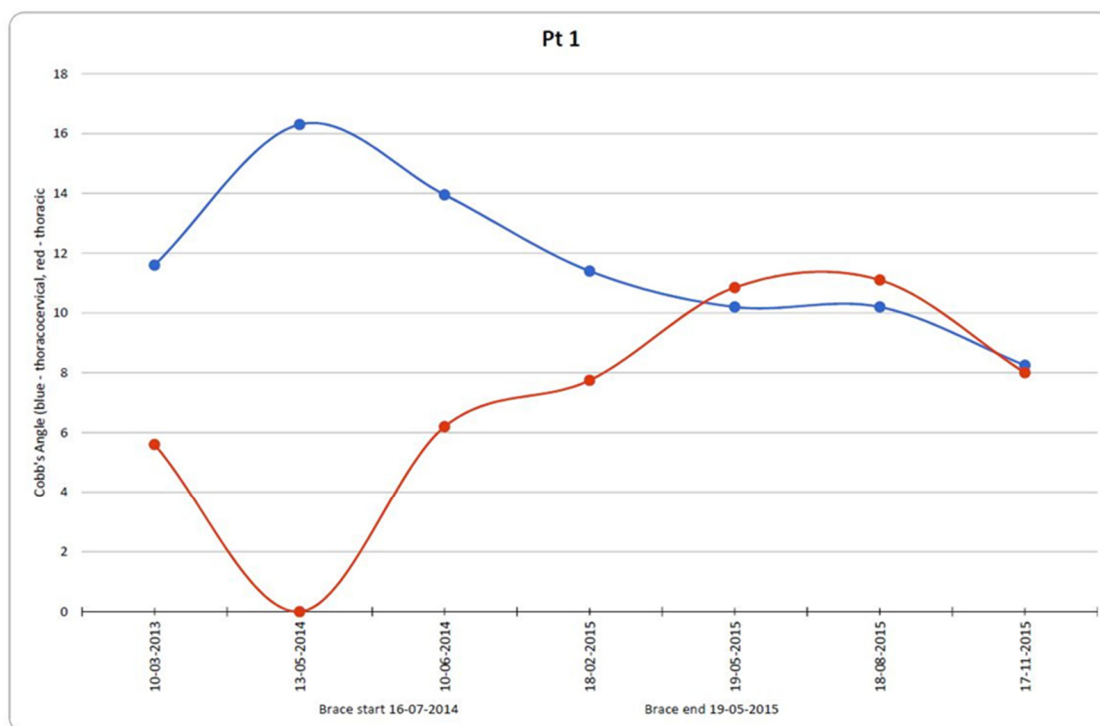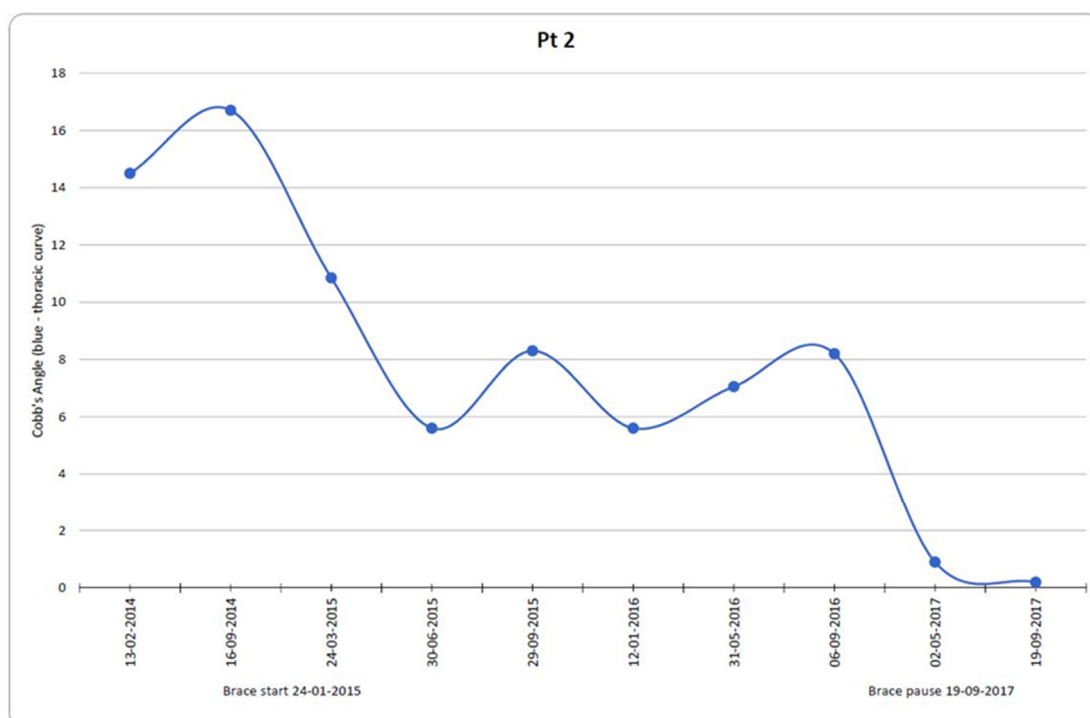

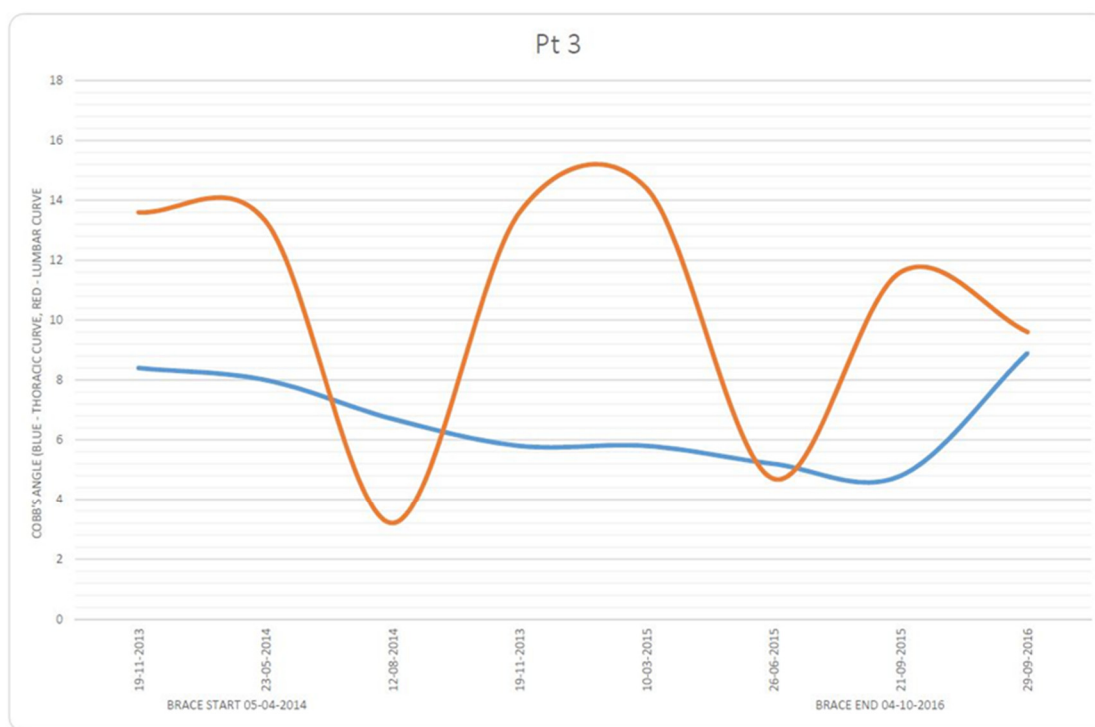

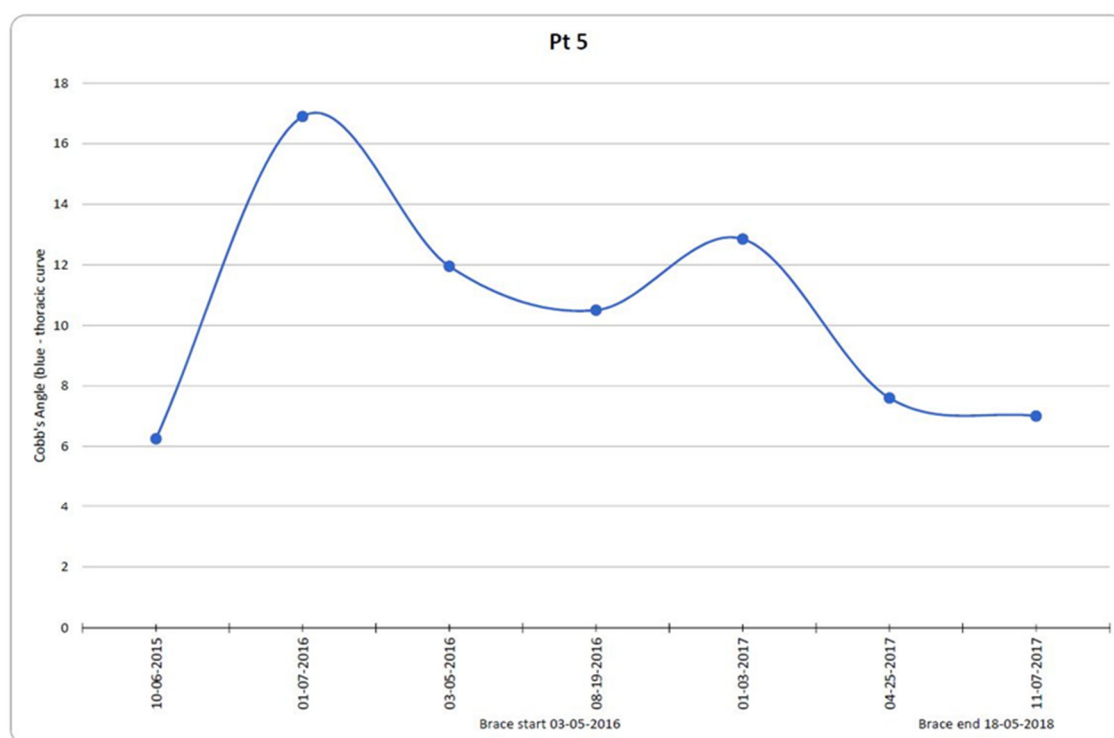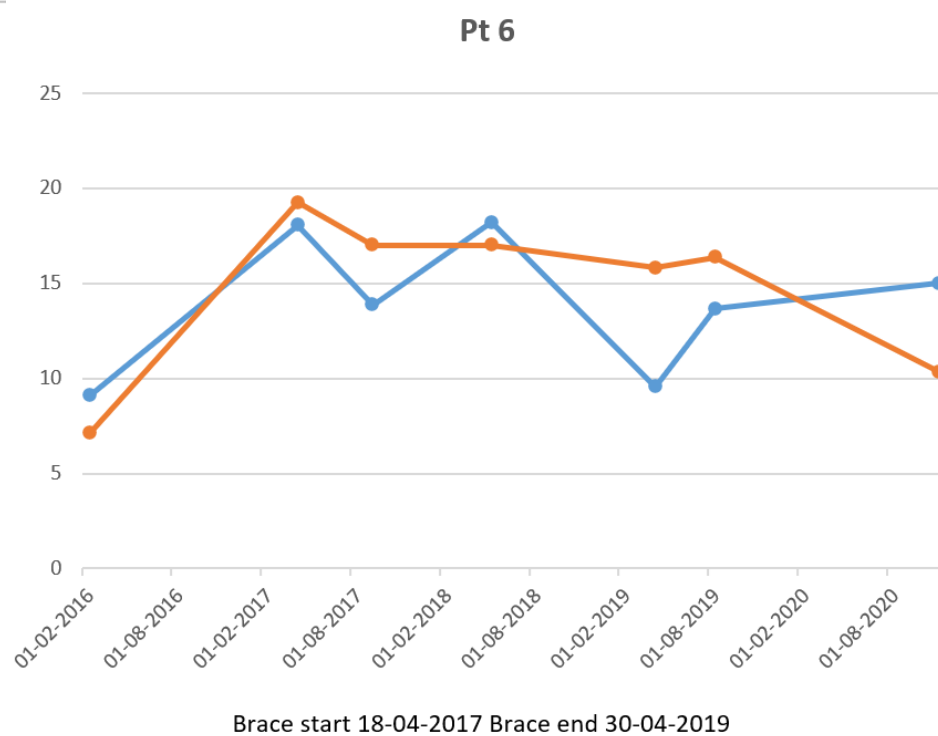

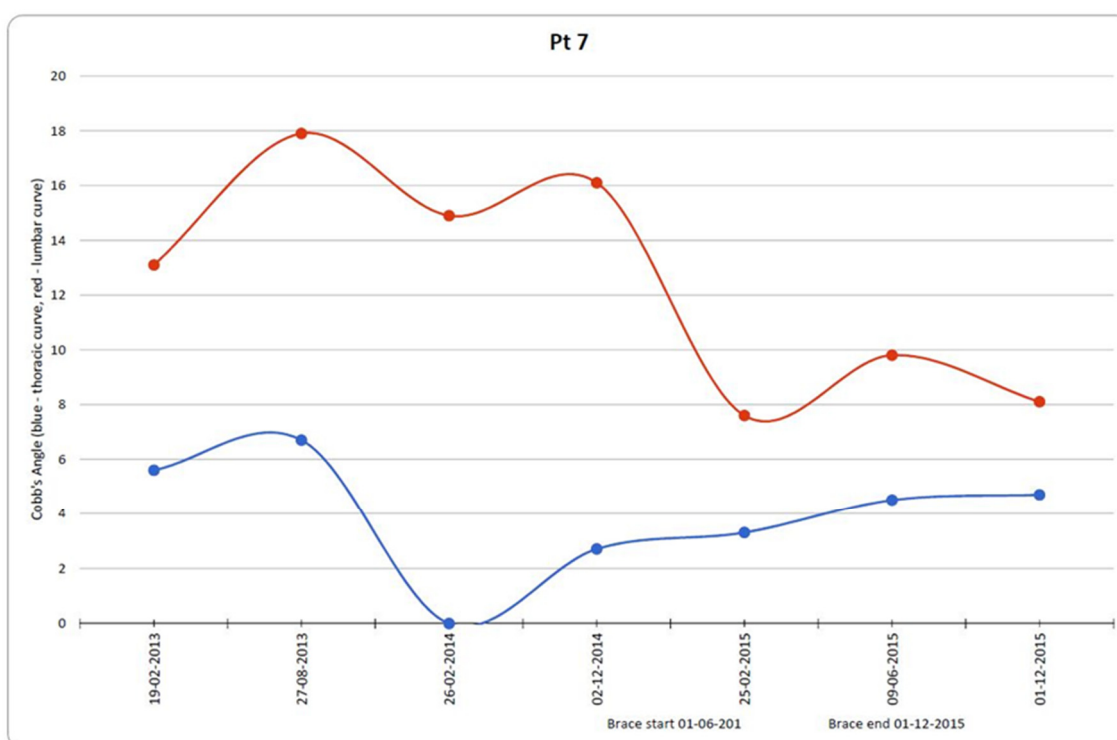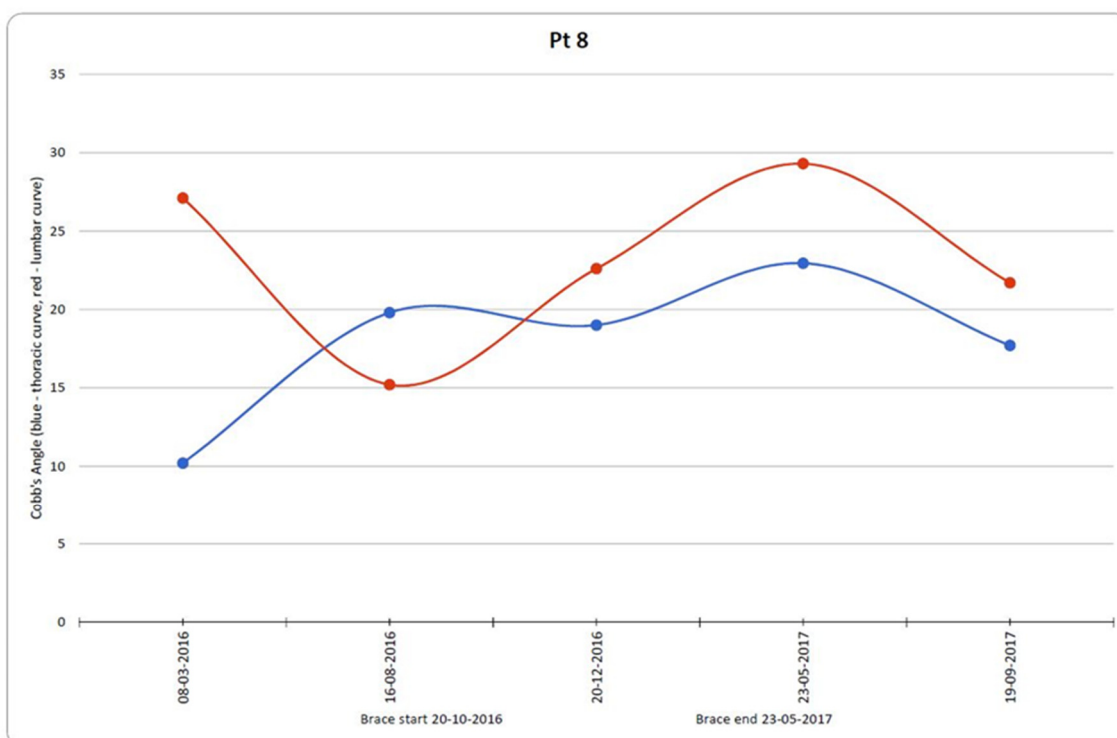

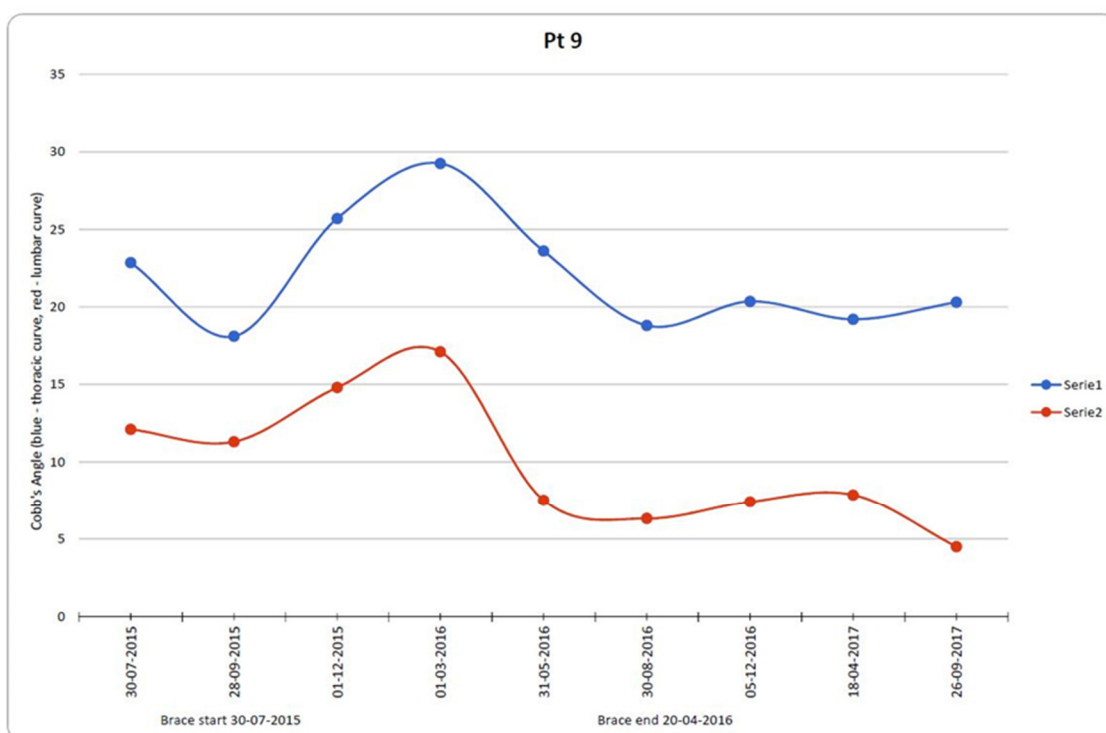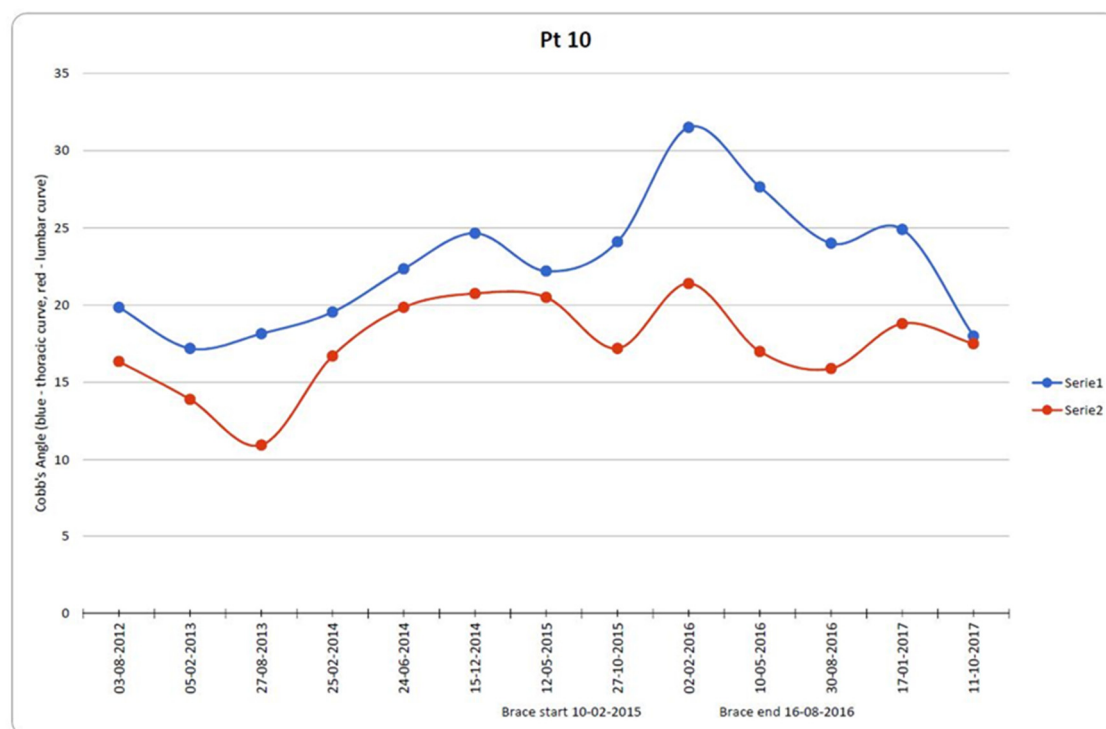

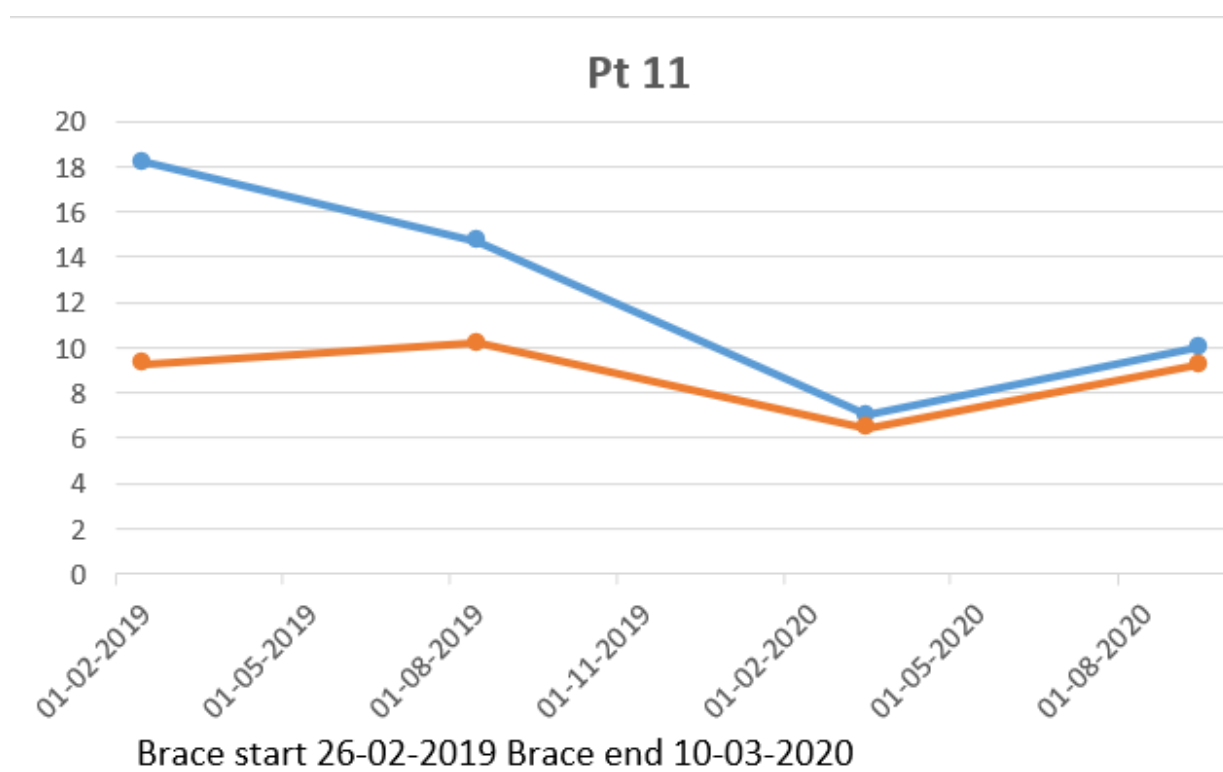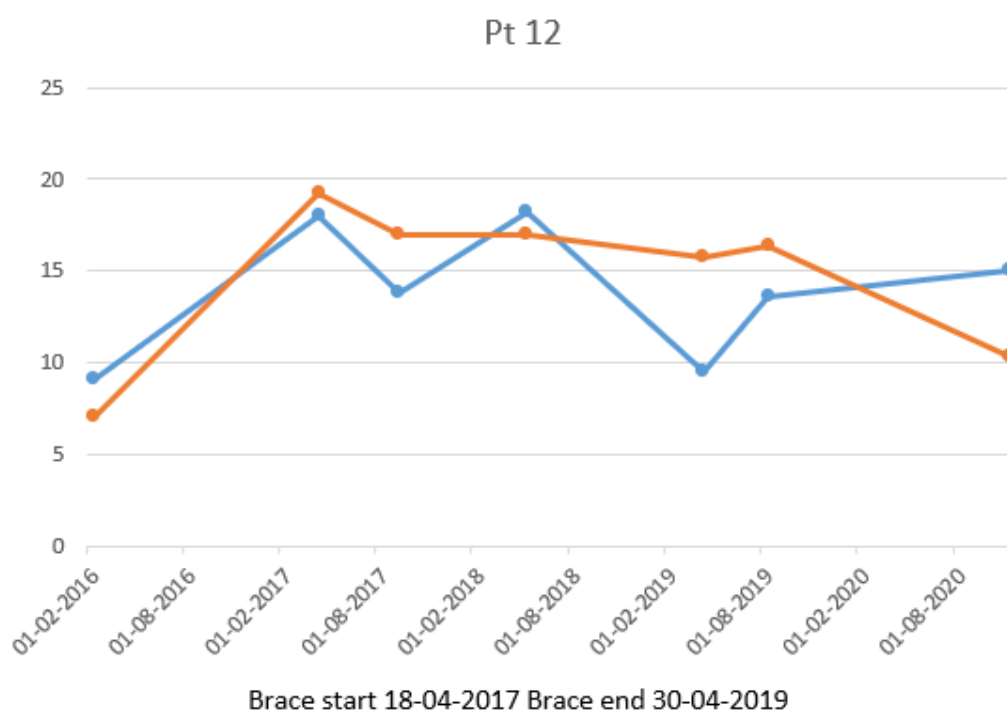

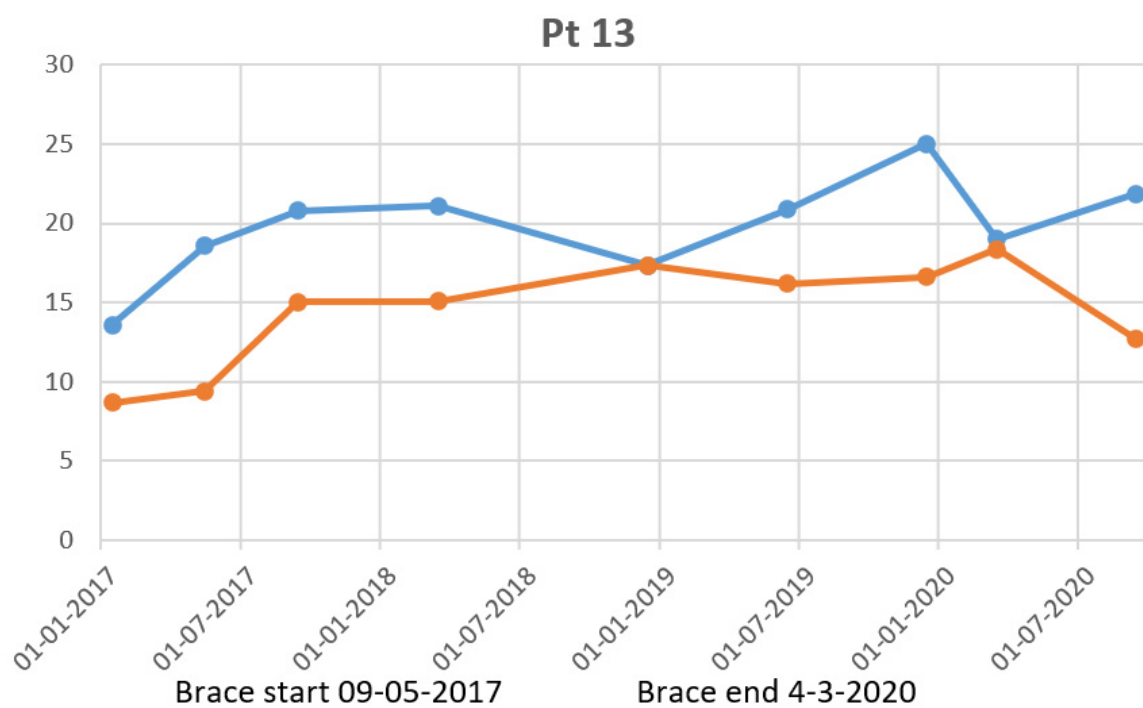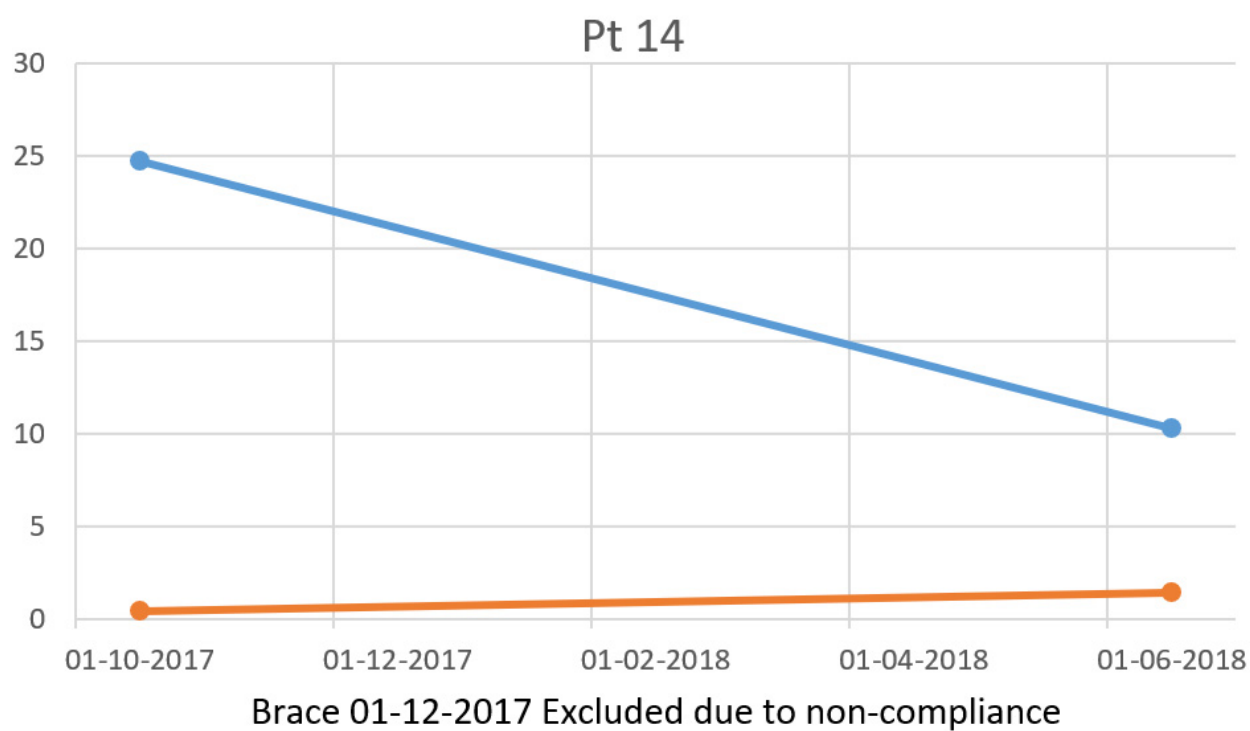

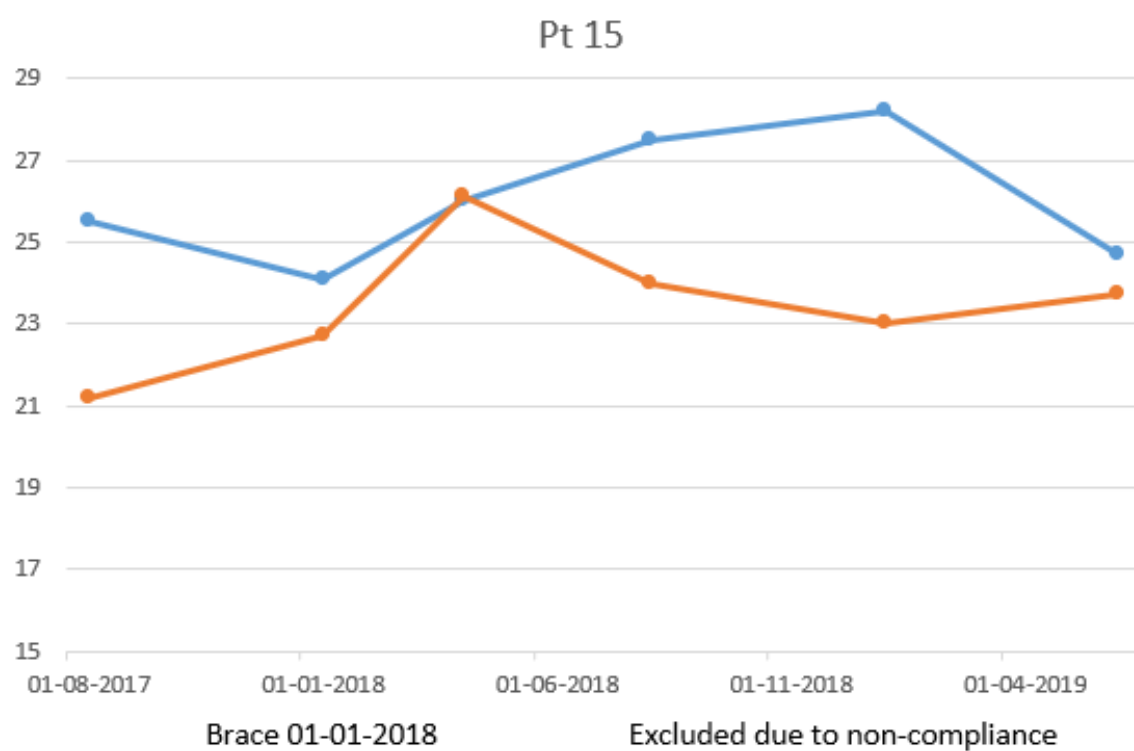

Supplement: s1 [file s1]
